# Supplementary material for: Sequencing the Plastid Genome of Giant Ragweed (Ambrosia trifida, Asteraceae) From a Herbarium Specimen
Source: PubMed Central journal article supplement (PMC6403193; doi:10.3389/fpls.2019.00218), 2019-02-28

# Inverted Repeat plot of 30 chloroplast genomes of Asteraceae

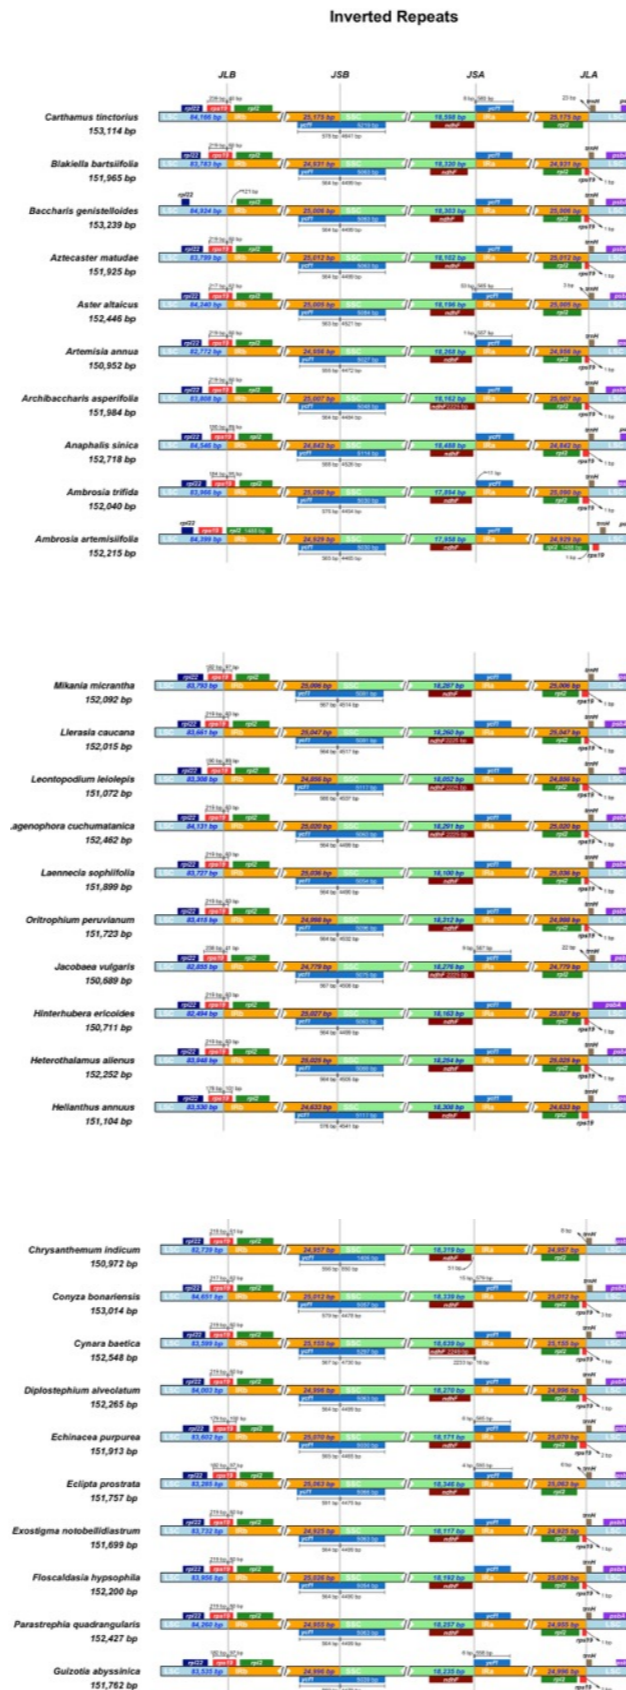

Supplement: Image_2.pdf [file Image_2.pdf]
