# Supplementary material for: Sequencing the Plastid Genome of Giant Ragweed (Ambrosia trifida, Asteraceae) From a Herbarium Specimen
Source: PubMed Central journal article supplement (PMC6403193; doi:10.3389/fpls.2019.00218), 2019-02-28
Supplement: Image_3.pdf [file Image_3.pdf]

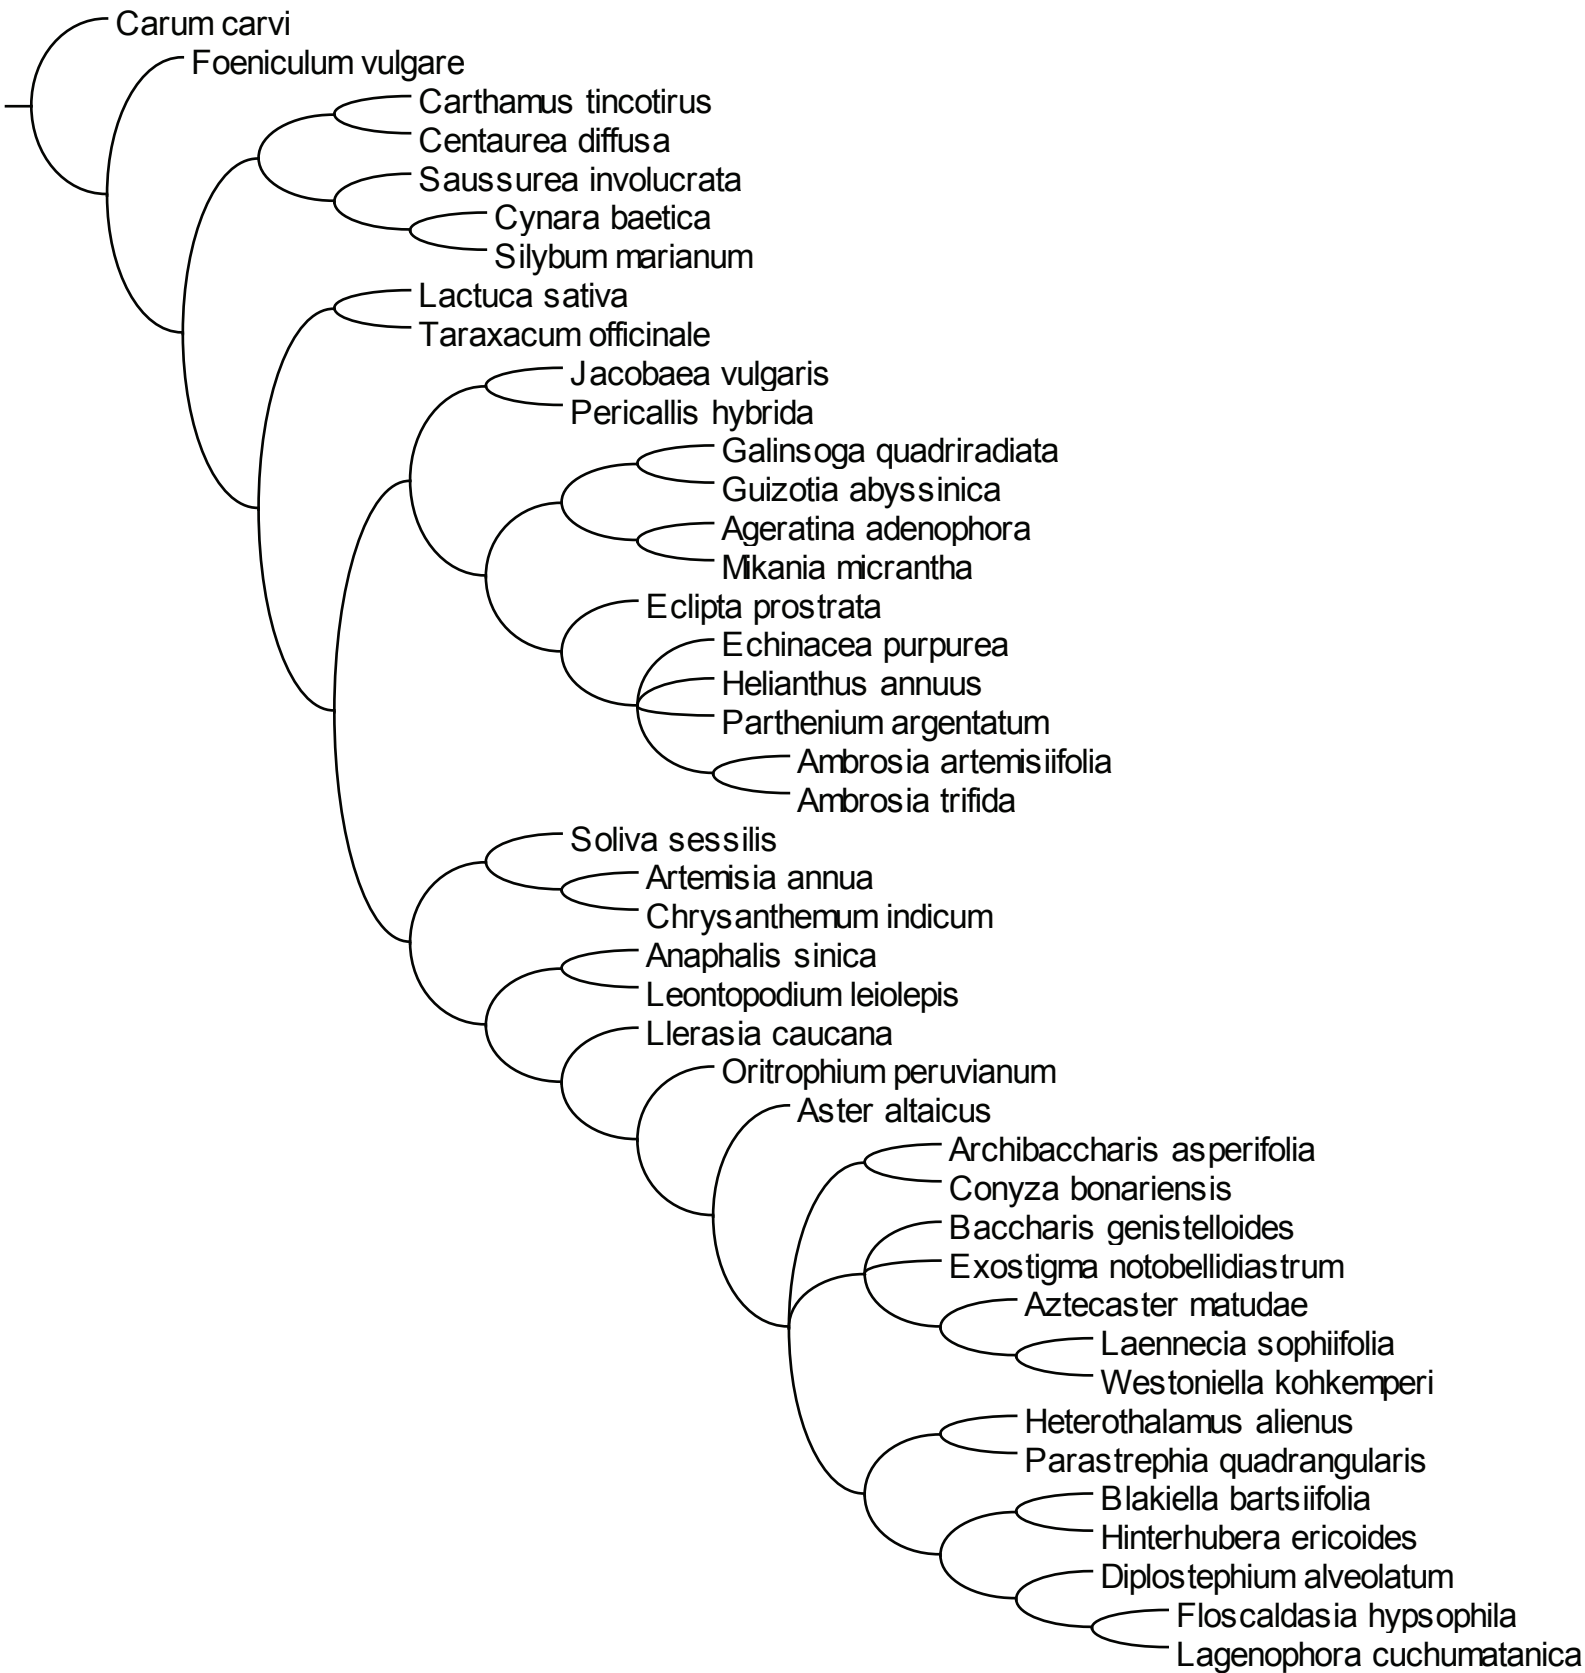

consensus of 6 EPT's of the length 7297 steps, CI 0.65 RI 0.83
